# Supplementary material for: Synchrotron radiation X-ray diffraction computed tomography (XRDCT): a new tool in cultural heritage and stone conservation for 3D non-destructive probing and phase analysis of inorganic re-treatments
Source: Royal Society of Chemistry journal article supplement (doi:10.1039/d3an02208k), 2024-01-01
Supplement: d3an02208k1.pdf [file d3an02208k1.pdf]

## Electronic supplementary information

### Synchrotron radiation X-ray Diffraction Computed Tomography (SRDCT). A new tool in Cultural Heritage and stone conservation for 3D non-destructive probing and phase analysis of inorganic re-treatments

Elena Possenti<sup>1,\*</sup>, Claudia Conti<sup>1</sup>, Nicoletta Marinoni<sup>2</sup>, Marco Realini<sup>1</sup>, Gavin B. M. Vaughan<sup>3</sup>, Chiara Colombo<sup>1</sup>

<sup>1</sup> *Istituto di Scienze del Patrimonio Culturale (ISPC), Consiglio Nazionale delle Ricerche (CNR), Via R. Cozzi 53, 20125 Milano, Italy. E-mail: elena.possenti@cnr.it; claudia.conti@cnr.it; marco.realini@cnr.it; chiara.colombo@cnr.it; Tel: +39 02 66173386*

<sup>2</sup> *Dipartimento di Scienze della Terra, Università degli Studi di Milano, Via S. Botticelli 23, 20133 Milano, Italy. E-mail: diego.gatta@unimi.it; marco.merlini@unimi.it; nicoletta.marinoni@unimi.it*

<sup>3</sup> *European Synchrotron Radiation Facility, 71 Avenue des Martyrs, 38000 Grenoble, France; vaughan@esrf.fr*

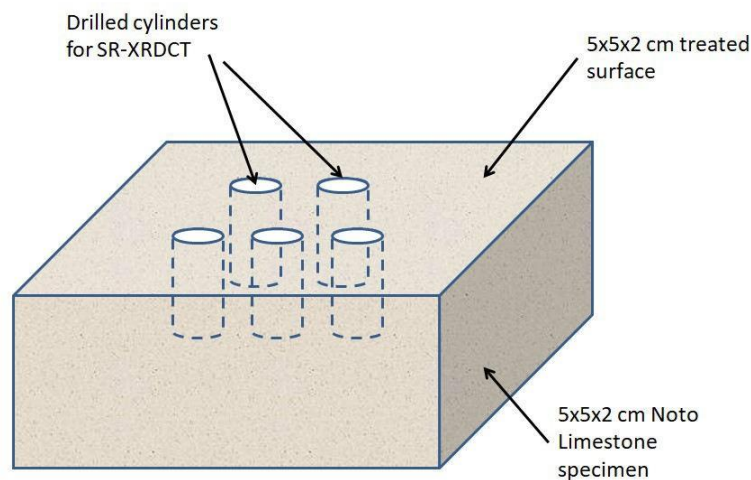

Figure S1. Scheme (not in scale) of the drilling regions to obtain the cylinders used for the SR XDCT measurements at ID15a.

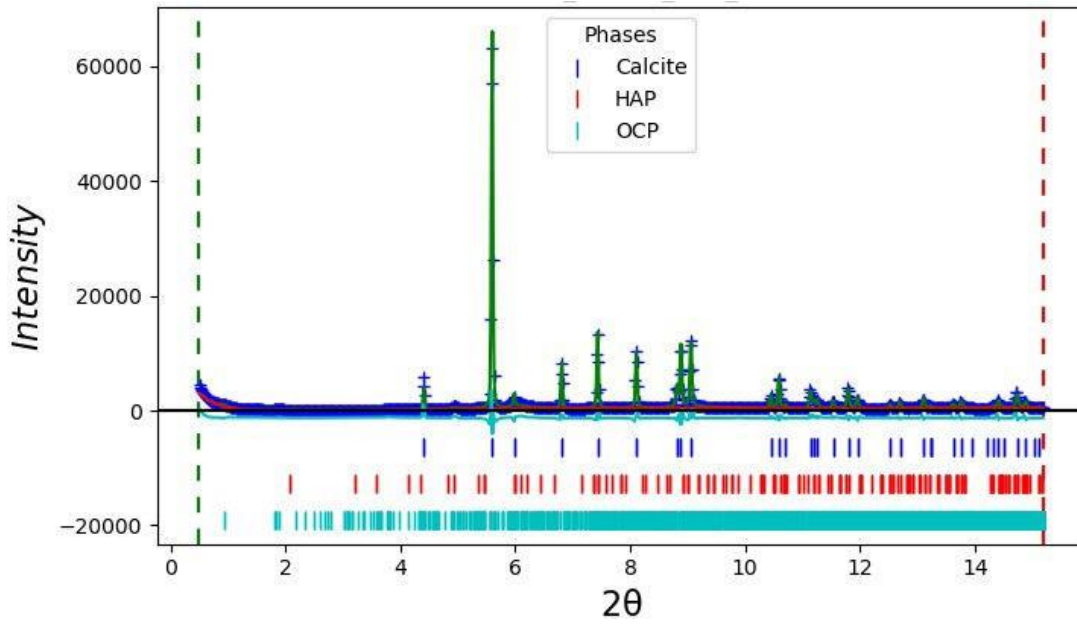

Figure S2. Refined XRD pattern extracted from the XRDCT dataset of the DAP treated Noto limestone

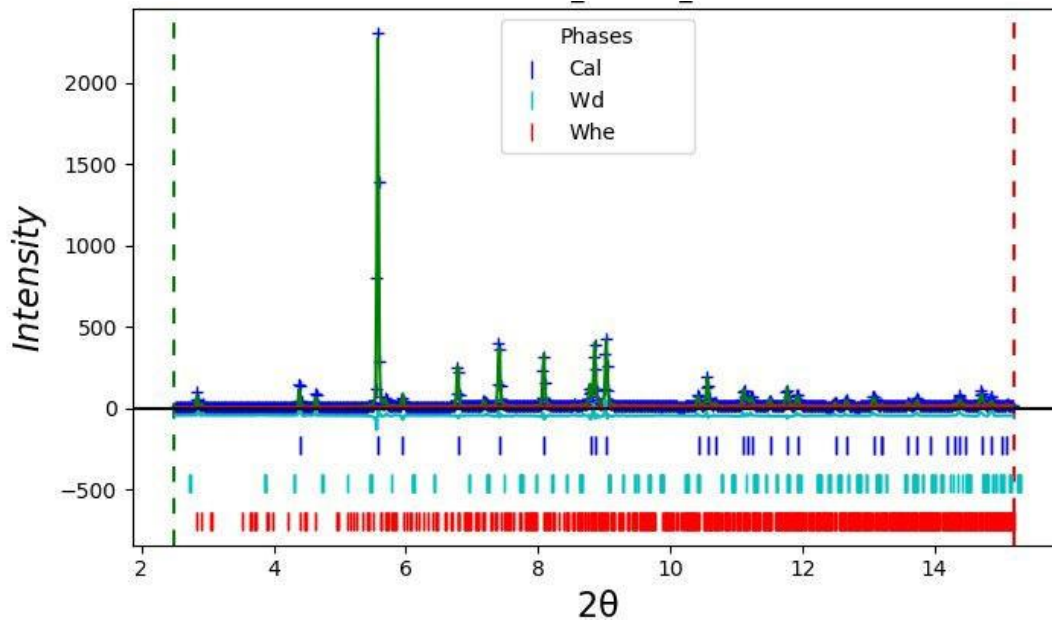

Figure S3. Refined XRD pattern extracted from the XRDCT dataset of the AmOx treated Noto limestone

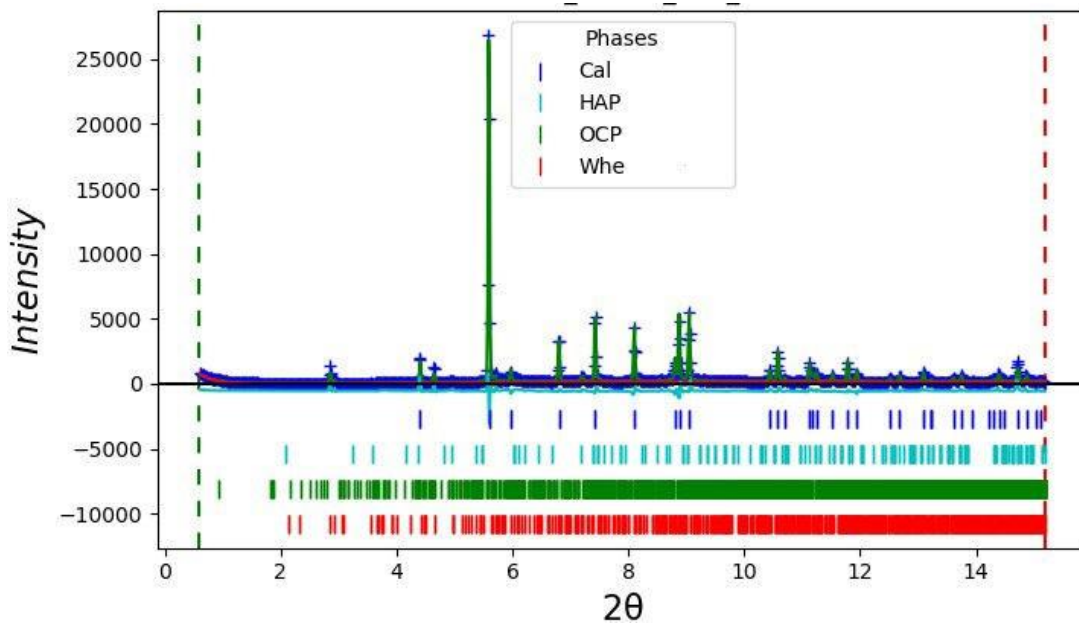

Figure S4. Refined XRD pattern extracted from the XRDCT dataset of the AmOx→DAP treated Noto limestone

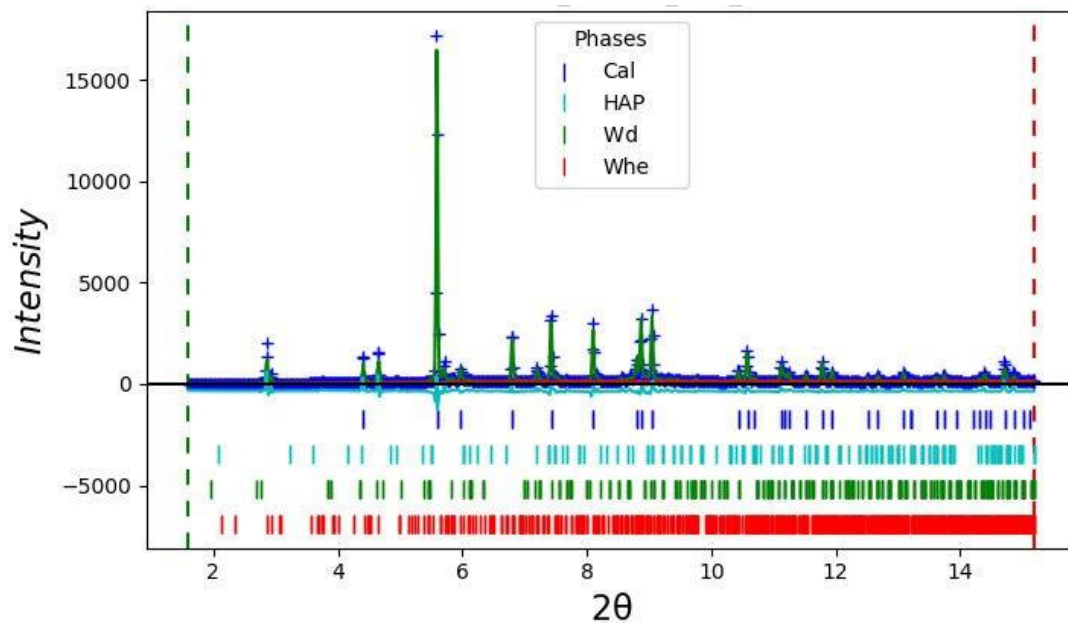

Figure S5. Refined XRD pattern extracted from the XRDCT dataset of the DAP→AmOx treated Noto limestone

**Table ST1. DAP treated Noto limestone. Weight fraction (Wt) and estimated standard deviation (Esd) of calcite, hydroxyapatite and octacalcium phosphate as a function of the penetration depth from the treated surface.**

| Penetration depth (µm) | Calcite |         | Hydroxyapatite |         | Octacalcium phosphate |         |
|------------------------|---------|---------|----------------|---------|-----------------------|---------|
|                        | Wt (%)  | Esd (%) | Wt (%)         | Esd (%) | Wt (%)                | Esd (%) |
| 0                      | 53.95   | 1.53    | 35.15          | 1.41    | 10.90                 | 1.69    |
| -15                    | 77.46   | 0.91    | 8.59           | 0.97    | 13.95                 | 0.87    |
| -30                    | 71.37   | 1.06    | 17.40          | 0.72    | 11.23                 | 0.82    |
| -45                    | 78.90   | 1.16    | 14.33          | 0.73    | 6.77                  | 0.81    |
| -60                    | 81.17   | 0.99    | 12.52          | 0.60    | 6.30                  | 0.67    |
| -75                    | 89.22   | 0.69    | 6.55           | 0.56    | 4.23                  | 0.48    |
| -90                    | 87.58   | 0.68    | 7.26           | 0.55    | 5.16                  | 0.47    |
| -105                   | 86.93   | 0.68    | 7.60           | 0.55    | 5.48                  | 0.47    |
| -120                   | 86.66   | 0.68    | 7.86           | 0.55    | 5.48                  | 0.47    |
| -135                   | 87.03   | 0.68    | 8.02           | 0.54    | 4.95                  | 0.46    |
| -150                   | 87.29   | 0.68    | 8.19           | 0.54    | 4.52                  | 0.45    |
| -165                   | 87.54   | 0.68    | 8.36           | 0.53    | 4.10                  | 0.44    |
| -180                   | 88.26   | 0.69    | 8.30           | 0.53    | 3.44                  | 0.44    |
| -195                   | 89.00   | 0.69    | 8.17           | 0.52    | 2.83                  | 0.42    |
| -210                   | 90.15   | 0.69    | 7.69           | 0.50    | 2.16                  | 0.40    |
| -225                   | 91.01   | 0.69    | 7.38           | 0.49    | 1.61                  | 0.39    |
| -240                   | 91.81   | 0.69    | 7.08           | 0.47    | 1.11                  | 0.38    |
| -255                   | 92.32   | 0.69    | 6.86           | 0.46    | 0.82                  | 0.37    |
| -270                   | 92.73   | 0.69    | 6.74           | 0.46    | 0.53                  | 0.37    |
| -285                   | 92.99   | 0.69    | 6.70           | 0.46    | 0.31                  | 0.36    |
| -300                   | 93.42   | 0.70    | 6.50           | 0.46    | 0.09                  | 0.36    |
| -315                   | 93.88   | 0.70    | 6.12           | 0.45    | 0.00                  | 0.00    |
| -330                   | 94.20   | 0.70    | 5.80           | 0.45    | 0.00                  | 0.00    |
| -345                   | 94.02   | 0.70    | 5.98           | 0.45    | 0.00                  | 0.00    |
| -360                   | 94.06   | 0.71    | 5.94           | 0.45    | 0.00                  | 0.00    |
| -375                   | 94.24   | 0.71    | 5.76           | 0.45    | 0.00                  | 0.00    |
| -390                   | 94.36   | 0.72    | 5.64           | 0.45    | 0.00                  | 0.00    |
| -405                   | 94.48   | 0.72    | 5.52           | 0.45    | 0.00                  | 0.00    |
| -420                   | 94.61   | 0.72    | 5.39           | 0.45    | 0.00                  | 0.00    |

|      |       |      |      |      |      |      |
|------|-------|------|------|------|------|------|
| -435 | 94.64 | 0.72 | 5.36 | 0.44 | 0.00 | 0.00 |
| -450 | 94.55 | 0.73 | 5.45 | 0.44 | 0.00 | 0.00 |
| -465 | 94.71 | 0.74 | 5.29 | 0.45 | 0.00 | 0.00 |
| -480 | 94.80 | 0.74 | 5.20 | 0.45 | 0.00 | 0.00 |
| -495 | 94.68 | 0.74 | 5.32 | 0.45 | 0.00 | 0.00 |
| -510 | 94.84 | 0.74 | 5.16 | 0.45 | 0.00 | 0.00 |
| -525 | 94.91 | 0.74 | 5.09 | 0.44 | 0.00 | 0.00 |
| -540 | 94.95 | 0.75 | 5.05 | 0.44 | 0.00 | 0.00 |
| -555 | 95.07 | 0.75 | 4.93 | 0.44 | 0.00 | 0.00 |
| -570 | 95.12 | 0.75 | 4.88 | 0.44 | 0.00 | 0.00 |
| -585 | 95.23 | 0.74 | 4.77 | 0.43 | 0.00 | 0.00 |
| -600 | 95.23 | 0.74 | 4.77 | 0.43 | 0.00 | 0.00 |
| -615 | 95.26 | 0.75 | 4.74 | 0.44 | 0.00 | 0.00 |
| -630 | 95.54 | 0.75 | 4.46 | 0.44 | 0.00 | 0.00 |
| -645 | 95.67 | 0.76 | 4.33 | 0.43 | 0.00 | 0.00 |
| -660 | 95.73 | 0.76 | 4.27 | 0.44 | 0.00 | 0.00 |
| -675 | 95.80 | 0.77 | 4.20 | 0.44 | 0.00 | 0.00 |
| -690 | 95.20 | 0.77 | 4.80 | 0.43 | 0.00 | 0.00 |
| -705 | 95.26 | 0.90 | 4.74 | 0.41 | 0.00 | 0.00 |
| -720 | 95.07 | 0.91 | 4.93 | 0.42 | 0.00 | 0.00 |
| -735 | 95.14 | 0.92 | 4.86 | 0.42 | 0.00 | 0.00 |
| -750 | 95.28 | 0.90 | 4.72 | 0.41 | 0.00 | 0.00 |
| -765 | 95.22 | 0.89 | 4.78 | 0.41 | 0.00 | 0.00 |
| -780 | 95.15 | 0.89 | 4.85 | 0.40 | 0.00 | 0.00 |
| -795 | 95.15 | 0.88 | 4.85 | 0.40 | 0.00 | 0.00 |
| -810 | 95.22 | 0.88 | 4.78 | 0.40 | 0.00 | 0.00 |
| -825 | 95.34 | 0.88 | 4.66 | 0.39 | 0.00 | 0.00 |
| -840 | 95.41 | 0.88 | 4.59 | 0.39 | 0.00 | 0.00 |
| -855 | 95.79 | 0.87 | 4.21 | 0.39 | 0.00 | 0.00 |
| -870 | 95.91 | 0.87 | 4.09 | 0.38 | 0.00 | 0.00 |
| -885 | 95.85 | 0.87 | 4.15 | 0.38 | 0.00 | 0.00 |
| -900 | 95.79 | 0.87 | 4.21 | 0.39 | 0.00 | 0.00 |

|       |       |      |      |      |      |      |
|-------|-------|------|------|------|------|------|
| -915  | 95.76 | 0.87 | 4.24 | 0.39 | 0.00 | 0.00 |
| -930  | 96.46 | 0.84 | 3.54 | 0.37 | 0.00 | 0.00 |
| -945  | 96.41 | 0.84 | 3.59 | 0.37 | 0.00 | 0.00 |
| -960  | 96.37 | 0.84 | 3.63 | 0.37 | 0.00 | 0.00 |
| -975  | 96.31 | 0.84 | 3.69 | 0.37 | 0.00 | 0.00 |
| -990  | 96.14 | 0.85 | 3.86 | 0.37 | 0.00 | 0.00 |
| -1005 | 96.11 | 0.86 | 3.89 | 0.38 | 0.00 | 0.00 |
| -1020 | 96.18 | 0.86 | 3.82 | 0.38 | 0.00 | 0.00 |
| -1035 | 96.22 | 0.85 | 3.78 | 0.37 | 0.00 | 0.00 |
| -1050 | 96.27 | 0.85 | 3.73 | 0.37 | 0.00 | 0.00 |
| -1065 | 96.31 | 0.86 | 3.69 | 0.37 | 0.00 | 0.00 |
| -1080 | 96.29 | 0.87 | 3.71 | 0.38 | 0.00 | 0.00 |
| -1095 | 96.10 | 0.88 | 3.90 | 0.38 | 0.00 | 0.00 |
| -1110 | 96.16 | 0.88 | 3.84 | 0.38 | 0.00 | 0.00 |
| -1125 | 96.13 | 0.87 | 3.87 | 0.38 | 0.00 | 0.00 |
| -1140 | 96.04 | 0.87 | 3.96 | 0.38 | 0.00 | 0.00 |
| -1155 | 96.11 | 0.87 | 3.89 | 0.38 | 0.00 | 0.00 |
| -1170 | 96.19 | 0.87 | 3.81 | 0.37 | 0.00 | 0.00 |
| -1185 | 96.25 | 0.86 | 3.75 | 0.37 | 0.00 | 0.00 |
| -1200 | 96.34 | 0.84 | 3.66 | 0.36 | 0.00 | 0.00 |
| -1215 | 96.43 | 0.83 | 3.57 | 0.35 | 0.00 | 0.00 |
| -1230 | 96.42 | 0.84 | 3.58 | 0.36 | 0.00 | 0.00 |
| -1245 | 96.38 | 0.85 | 3.62 | 0.36 | 0.00 | 0.00 |
| -1260 | 96.32 | 0.85 | 3.68 | 0.36 | 0.00 | 0.00 |
| -1275 | 96.43 | 0.86 | 3.57 | 0.36 | 0.00 | 0.00 |
| -1290 | 96.54 | 0.85 | 3.46 | 0.36 | 0.00 | 0.00 |
| -1305 | 96.35 | 0.85 | 3.65 | 0.36 | 0.00 | 0.00 |
| -1320 | 96.31 | 0.84 | 3.69 | 0.36 | 0.00 | 0.00 |
| -1335 | 96.44 | 0.83 | 3.56 | 0.35 | 0.00 | 0.00 |
| -1350 | 96.42 | 0.83 | 3.58 | 0.35 | 0.00 | 0.00 |
| -1365 | 96.43 | 0.83 | 3.57 | 0.34 | 0.00 | 0.00 |
| -1380 | 96.36 | 0.82 | 3.64 | 0.34 | 0.00 | 0.00 |

|       |       |      |      |      |      |      |
|-------|-------|------|------|------|------|------|
| -1395 | 96.18 | 0.83 | 3.82 | 0.35 | 0.00 | 0.00 |
| -1410 | 96.21 | 0.83 | 3.79 | 0.35 | 0.00 | 0.00 |
| -1425 | 96.15 | 0.84 | 3.85 | 0.36 | 0.00 | 0.00 |
| -1440 | 95.98 | 0.86 | 4.02 | 0.37 | 0.00 | 0.00 |

**Table ST2. DAP treated Noto limestone. Weight fraction (Wt) and estimated standard deviation (Esd) of calcite and whewellite, as a function of the penetration depth from the treated surface.**

| Penetration depth (µm) | Calcite |         | Whewellite |         |
|------------------------|---------|---------|------------|---------|
|                        | Wt (%)  | Esd (%) | Wt (%)     | Esd (%) |
| 0                      | 89.65   | 0.66    | 10.35      | 0.35    |
| -15                    | 91.81   | 0.69    | 8.19       | 0.33    |
| -30                    | 93.10   | 0.76    | 6.90       | 0.35    |
| -45                    | 93.26   | 0.77    | 6.74       | 0.35    |
| -60                    | 93.15   | 0.76    | 6.85       | 0.35    |
| -75                    | 92.84   | 0.77    | 7.16       | 0.37    |
| -90                    | 92.12   | 0.81    | 7.88       | 0.41    |
| -105                   | 90.11   | 0.73    | 9.89       | 0.38    |
| -120                   | 90.24   | 0.77    | 9.76       | 0.40    |
| -135                   | 90.41   | 0.76    | 9.59       | 0.39    |
| -150                   | 90.30   | 0.78    | 9.70       | 0.40    |
| -165                   | 89.58   | 0.78    | 10.42      | 0.42    |
| -180                   | 89.19   | 0.79    | 10.81      | 0.43    |
| -195                   | 89.26   | 0.80    | 10.74      | 0.43    |
| -210                   | 89.32   | 0.80    | 10.68      | 0.43    |
| -225                   | 88.94   | 0.80    | 11.06      | 0.43    |
| -240                   | 88.46   | 0.80    | 11.54      | 0.44    |
| -255                   | 88.87   | 0.78    | 11.13      | 0.43    |
| -270                   | 89.17   | 0.77    | 10.83      | 0.41    |
| -285                   | 89.93   | 0.75    | 10.07      | 0.39    |
| -300                   | 90.77   | 0.74    | 9.23       | 0.38    |
| -315                   | 90.80   | 0.74    | 9.20       | 0.37    |
| -330                   | 90.35   | 0.75    | 9.65       | 0.38    |
| -345                   | 89.66   | 0.76    | 10.34      | 0.40    |
| -360                   | 89.56   | 0.77    | 10.44      | 0.41    |
| -375                   | 89.18   | 0.77    | 10.82      | 0.42    |
| -390                   | 88.94   | 0.76    | 11.06      | 0.41    |
| -405                   | 89.13   | 0.76    | 10.87      | 0.40    |
| -420                   | 89.61   | 0.74    | 10.39      | 0.38    |



|      |       |      |      |      |
|------|-------|------|------|------|
| -435 | 90.35 | 0.73 | 9.65 | 0.36 |
| -450 | 90.85 | 0.72 | 9.15 | 0.35 |
| -465 | 91.04 | 0.71 | 8.96 | 0.34 |
| -480 | 91.21 | 0.71 | 8.79 | 0.34 |
| -495 | 91.52 | 0.70 | 8.48 | 0.33 |
| -510 | 92.96 | 0.72 | 7.04 | 0.33 |
| -525 | 92.94 | 0.73 | 7.06 | 0.34 |
| -540 | 93.34 | 0.73 | 6.66 | 0.33 |
| -555 | 93.69 | 0.73 | 6.31 | 0.33 |
| -570 | 93.78 | 0.73 | 6.22 | 0.33 |
| -585 | 93.62 | 0.73 | 6.38 | 0.33 |
| -600 | 93.60 | 0.72 | 6.40 | 0.33 |
| -615 | 93.79 | 0.72 | 6.21 | 0.32 |
| -630 | 93.86 | 0.71 | 6.14 | 0.31 |
| -645 | 94.09 | 0.70 | 5.91 | 0.30 |
| -660 | 94.74 | 0.71 | 5.26 | 0.30 |
| -675 | 94.84 | 0.71 | 5.16 | 0.30 |
| -690 | 94.93 | 0.70 | 5.07 | 0.30 |
| -705 | 94.88 | 0.69 | 5.12 | 0.29 |
| -720 | 94.75 | 0.69 | 5.25 | 0.29 |
| -735 | 94.67 | 0.70 | 5.33 | 0.30 |
| -750 | 94.57 | 0.71 | 5.43 | 0.30 |
| -765 | 94.70 | 0.71 | 5.30 | 0.30 |
| -780 | 94.82 | 0.70 | 5.18 | 0.29 |
| -795 | 94.84 | 0.71 | 5.16 | 0.30 |
| -810 | 95.02 | 0.70 | 4.98 | 0.29 |
| -825 | 95.21 | 0.70 | 4.79 | 0.28 |
| -840 | 95.34 | 0.70 | 4.66 | 0.28 |
| -855 | 95.65 | 0.70 | 4.35 | 0.28 |
| -870 | 95.90 | 0.69 | 4.10 | 0.27 |
| -885 | 96.18 | 0.68 | 3.82 | 0.26 |
| -900 | 96.26 | 0.68 | 3.74 | 0.26 |

|       |       |      |      |      |
|-------|-------|------|------|------|
| -915  | 96.43 | 0.67 | 3.57 | 0.25 |
| -930  | 96.68 | 0.66 | 3.32 | 0.24 |
| -945  | 96.98 | 0.66 | 3.02 | 0.24 |
| -960  | 97.14 | 0.68 | 2.86 | 0.24 |
| -975  | 97.19 | 0.69 | 2.81 | 0.25 |
| -990  | 97.19 | 0.69 | 2.81 | 0.24 |
| -1005 | 97.30 | 0.69 | 2.70 | 0.24 |
| -1020 | 97.40 | 0.68 | 2.60 | 0.23 |
| -1035 | 97.42 | 0.68 | 2.58 | 0.23 |
| -1050 | 97.46 | 0.68 | 2.54 | 0.23 |
| -1065 | 97.55 | 0.68 | 2.45 | 0.23 |
| -1080 | 97.68 | 0.67 | 2.32 | 0.22 |
| -1095 | 97.70 | 0.67 | 2.30 | 0.22 |
| -1110 | 97.80 | 0.67 | 2.20 | 0.21 |
| -1125 | 97.95 | 0.67 | 2.05 | 0.21 |
| -1140 | 98.07 | 0.66 | 1.93 | 0.21 |
| -1155 | 98.17 | 0.67 | 1.83 | 0.21 |
| -1170 | 98.25 | 0.68 | 1.75 | 0.21 |
| -1185 | 98.25 | 0.68 | 1.75 | 0.21 |
| -1200 | 98.27 | 0.68 | 1.73 | 0.21 |
| -1215 | 98.20 | 0.66 | 1.80 | 0.20 |
| -1230 | 98.17 | 0.65 | 1.83 | 0.20 |
| -1245 | 98.11 | 0.67 | 1.89 | 0.21 |
| -1260 | 98.06 | 0.68 | 1.94 | 0.21 |
| -1275 | 98.03 | 0.68 | 1.97 | 0.21 |
| -1290 | 98.03 | 0.67 | 1.97 | 0.21 |
| -1305 | 98.12 | 0.66 | 1.88 | 0.20 |
| -1320 | 98.21 | 0.65 | 1.79 | 0.19 |
| -1335 | 98.17 | 0.65 | 1.83 | 0.20 |
| -1350 | 98.09 | 0.66 | 1.91 | 0.20 |
| -1365 | 98.01 | 0.66 | 1.99 | 0.21 |
| -1380 | 98.03 | 0.67 | 1.97 | 0.21 |

|       |       |      |       |      |
|-------|-------|------|-------|------|
| -1395 | 98.14 | 0.67 | 1.86  | 0.20 |
| -1410 | 98.22 | 0.68 | 1.78  | 0.20 |
| -1425 | 89.65 | 0.66 | 10.35 | 0.35 |
| -1440 | 91.81 | 0.69 | 8.19  | 0.33 |
| -1455 | 93.10 | 0.76 | 6.90  | 0.35 |
| -1470 | 93.26 | 0.77 | 6.74  | 0.35 |

**Table ST3. AmOx→DAP treated Noto limestone. Weight fraction (Wt) and estimated standard deviation (Esd) of calcite, whewellite, hydroxyapatite and octacalcium phosphate as a function of the penetration depth from the treated surface.**

| Penetration depth (μm) | Calcite |         | Whewellite |         | Hydroxyapatite |         | Octacalcium phosphate |         |
|------------------------|---------|---------|------------|---------|----------------|---------|-----------------------|---------|
|                        | Wt (%)  | Esd (%) | Wt (%)     | Esd (%) | Wt (%)         | Esd (%) | Wt (%)                | Esd (%) |
| 0                      | 61.82   | 1.53    | 9.34       | 0.89    | 21.72          | 0.57    | 7.10                  | 0.62    |
| -15                    | 75.29   | 1.39    | 7.83       | 0.67    | 13.00          | 0.40    | 3.90                  | 0.41    |
| -30                    | 75.58   | 1.34    | 8.49       | 0.66    | 12.18          | 0.38    | 3.70                  | 0.38    |
| -45                    | 72.69   | 1.36    | 9.24       | 0.70    | 10.92          | 0.39    | 7.20                  | 0.38    |
| -60                    | 75.57   | 1.28    | 9.12       | 0.65    | 11.63          | 0.36    | 3.70                  | 0.35    |
| -75                    | 74.42   | 1.30    | 10.04      | 0.68    | 11.99          | 0.37    | 3.50                  | 0.35    |
| -90                    | 77.00   | 1.23    | 10.12      | 0.64    | 9.83           | 0.34    | 3.10                  | 0.32    |
| -105                   | 83.26   | 0.66    | 12.97      | 0.44    | 1.70           | 0.30    | 2.08                  | 0.40    |
| -120                   | 80.70   | 0.63    | 14.18      | 0.44    | 1.76           | 0.29    | 3.36                  | 0.39    |
| -135                   | 79.77   | 0.62    | 14.78      | 0.43    | 1.74           | 0.28    | 3.71                  | 0.38    |
| -150                   | 78.73   | 0.62    | 16.52      | 0.43    | 2.29           | 0.26    | 2.47                  | 0.53    |
| -165                   | 76.66   | 0.62    | 18.31      | 0.44    | 2.61           | 0.26    | 2.41                  | 0.53    |
| -180                   | 75.30   | 0.62    | 19.48      | 0.45    | 2.88           | 0.26    | 2.34                  | 0.53    |
| -195                   | 75.33   | 0.62    | 19.41      | 0.45    | 3.01           | 0.26    | 2.26                  | 0.52    |
| -210                   | 75.87   | 0.62    | 18.89      | 0.44    | 3.06           | 0.26    | 2.18                  | 0.51    |
| -225                   | 76.96   | 0.62    | 17.92      | 0.43    | 2.99           | 0.25    | 2.12                  | 0.50    |
| -240                   | 77.91   | 0.61    | 17.22      | 0.42    | 2.97           | 0.25    | 1.90                  | 0.49    |
| -255                   | 79.46   | 0.62    | 16.01      | 0.41    | 2.62           | 0.25    | 1.91                  | 0.49    |
| -270                   | 81.01   | 0.63    | 15.85      | 0.41    | 3.14           | 0.25    | 0.00                  | 0.00    |
| -285                   | 81.90   | 0.62    | 15.03      | 0.40    | 3.07           | 0.24    | 0.00                  | 0.00    |
| -300                   | 82.95   | 0.61    | 14.14      | 0.38    | 2.91           | 0.23    | 0.00                  | 0.00    |
| -315                   | 84.35   | 0.59    | 13.06      | 0.35    | 2.59           | 0.22    | 0.00                  | 0.00    |
| -330                   | 84.80   | 0.59    | 12.76      | 0.35    | 2.44           | 0.21    | 0.00                  | 0.00    |
| -345                   | 84.46   | 0.60    | 13.11      | 0.36    | 2.43           | 0.22    | 0.00                  | 0.00    |
| -360                   | 84.11   | 0.61    | 13.48      | 0.37    | 2.41           | 0.22    | 0.00                  | 0.00    |
| -375                   | 84.66   | 0.61    | 13.08      | 0.37    | 2.26           | 0.22    | 0.00                  | 0.00    |
| -390                   | 85.59   | 0.61    | 12.26      | 0.35    | 2.15           | 0.22    | 0.00                  | 0.00    |
| -405                   | 85.99   | 0.59    | 11.99      | 0.34    | 2.02           | 0.21    | 0.00                  | 0.00    |
| -420                   | 86.14   | 0.60    | 11.88      | 0.35    | 1.98           | 0.21    | 0.00                  | 0.00    |

|      |       |      |       |      |      |      |      |      |
|------|-------|------|-------|------|------|------|------|------|
| -435 | 86.59 | 0.60 | 11.49 | 0.35 | 1.92 | 0.21 | 0.00 | 0.00 |
| -450 | 87.17 | 0.59 | 10.98 | 0.34 | 1.85 | 0.21 | 0.00 | 0.00 |
| -465 | 88.06 | 0.59 | 10.17 | 0.32 | 1.76 | 0.20 | 0.00 | 0.00 |
| -480 | 88.38 | 0.58 | 9.86  | 0.31 | 1.75 | 0.20 | 0.00 | 0.00 |
| -495 | 88.30 | 0.58 | 9.88  | 0.31 | 1.83 | 0.20 | 0.00 | 0.00 |
| -510 | 88.30 | 0.59 | 9.88  | 0.31 | 1.82 | 0.20 | 0.00 | 0.00 |
| -525 | 88.14 | 0.59 | 10.04 | 0.32 | 1.82 | 0.20 | 0.00 | 0.00 |
| -540 | 88.22 | 0.60 | 10.00 | 0.32 | 1.79 | 0.20 | 0.00 | 0.00 |
| -555 | 88.75 | 0.61 | 9.58  | 0.32 | 1.67 | 0.20 | 0.00 | 0.00 |
| -570 | 89.24 | 0.60 | 9.15  | 0.31 | 1.60 | 0.19 | 0.00 | 0.00 |
| -585 | 89.45 | 0.59 | 8.90  | 0.30 | 1.65 | 0.19 | 0.00 | 0.00 |
| -600 | 89.96 | 0.63 | 8.49  | 0.32 | 1.55 | 0.20 | 0.00 | 0.00 |
| -615 | 90.39 | 0.64 | 8.13  | 0.31 | 1.47 | 0.20 | 0.00 | 0.00 |
| -630 | 90.38 | 0.65 | 8.22  | 0.32 | 1.40 | 0.20 | 0.00 | 0.00 |
| -645 | 90.36 | 0.66 | 8.24  | 0.33 | 1.41 | 0.21 | 0.00 | 0.00 |
| -660 | 90.79 | 0.66 | 7.81  | 0.32 | 1.40 | 0.21 | 0.00 | 0.00 |
| -675 | 91.48 | 0.65 | 7.10  | 0.31 | 1.43 | 0.20 | 0.00 | 0.00 |
| -690 | 91.95 | 0.64 | 6.61  | 0.29 | 1.44 | 0.19 | 0.00 | 0.00 |
| -705 | 92.08 | 0.64 | 6.52  | 0.29 | 1.40 | 0.20 | 0.00 | 0.00 |
| -720 | 92.01 | 0.65 | 6.61  | 0.30 | 1.38 | 0.20 | 0.00 | 0.00 |
| -735 | 91.63 | 0.66 | 6.85  | 0.31 | 1.52 | 0.21 | 0.00 | 0.00 |
| -750 | 91.49 | 0.66 | 6.81  | 0.31 | 1.70 | 0.21 | 0.00 | 0.00 |
| -765 | 91.41 | 0.68 | 6.74  | 0.31 | 1.85 | 0.22 | 0.00 | 0.00 |
| -780 | 91.26 | 0.70 | 6.74  | 0.32 | 2.00 | 0.22 | 0.00 | 0.00 |
| -795 | 91.04 | 0.71 | 6.84  | 0.33 | 2.12 | 0.23 | 0.00 | 0.00 |
| -810 | 91.21 | 0.71 | 6.72  | 0.32 | 2.07 | 0.23 | 0.00 | 0.00 |
| -825 | 91.37 | 0.71 | 6.61  | 0.32 | 2.02 | 0.22 | 0.00 | 0.00 |
| -840 | 91.54 | 0.70 | 6.54  | 0.31 | 1.92 | 0.22 | 0.00 | 0.00 |
| -855 | 92.00 | 0.68 | 6.24  | 0.30 | 1.76 | 0.21 | 0.00 | 0.00 |
| -870 | 92.66 | 0.66 | 5.83  | 0.29 | 1.51 | 0.20 | 0.00 | 0.00 |
| -885 | 92.99 | 0.65 | 5.58  | 0.28 | 1.43 | 0.20 | 0.00 | 0.00 |
| -900 | 93.11 | 0.65 | 5.44  | 0.27 | 1.45 | 0.19 | 0.00 | 0.00 |

|       |       |      |      |      |      |      |      |      |
|-------|-------|------|------|------|------|------|------|------|
| -915  | 93.37 | 0.65 | 5.21 | 0.27 | 1.42 | 0.19 | 0.00 | 0.00 |
| -930  | 93.39 | 0.66 | 5.12 | 0.27 | 1.49 | 0.19 | 0.00 | 0.00 |
| -945  | 93.53 | 0.65 | 4.98 | 0.26 | 1.49 | 0.19 | 0.00 | 0.00 |
| -960  | 93.64 | 0.66 | 4.84 | 0.27 | 1.52 | 0.20 | 0.00 | 0.00 |
| -975  | 93.53 | 0.67 | 4.87 | 0.27 | 1.60 | 0.20 | 0.00 | 0.00 |
| -990  | 93.53 | 0.66 | 4.83 | 0.27 | 1.64 | 0.20 | 0.00 | 0.00 |
| -1005 | 93.49 | 0.65 | 4.79 | 0.26 | 1.72 | 0.20 | 0.00 | 0.00 |
| -1020 | 93.40 | 0.65 | 4.73 | 0.26 | 1.86 | 0.20 | 0.00 | 0.00 |
| -1035 | 93.48 | 0.65 | 4.67 | 0.26 | 1.86 | 0.19 | 0.00 | 0.00 |
| -1050 | 93.70 | 0.65 | 4.56 | 0.25 | 1.74 | 0.19 | 0.00 | 0.00 |
| -1065 | 93.78 | 0.65 | 4.49 | 0.25 | 1.73 | 0.19 | 0.00 | 0.00 |
| -1080 | 93.86 | 0.65 | 4.36 | 0.25 | 1.78 | 0.19 | 0.00 | 0.00 |
| -1095 | 93.89 | 0.66 | 4.29 | 0.25 | 1.82 | 0.19 | 0.00 | 0.00 |
| -1110 | 93.67 | 0.68 | 4.42 | 0.26 | 1.91 | 0.20 | 0.00 | 0.00 |
| -1125 | 93.44 | 0.69 | 4.63 | 0.26 | 1.93 | 0.20 | 0.00 | 0.00 |
| -1140 | 93.48 | 0.69 | 4.61 | 0.26 | 1.91 | 0.20 | 0.00 | 0.00 |
| -1155 | 93.30 | 0.70 | 4.73 | 0.27 | 1.97 | 0.21 | 0.00 | 0.00 |
| -1170 | 93.38 | 0.70 | 4.73 | 0.27 | 1.89 | 0.20 | 0.00 | 0.00 |
| -1185 | 93.40 | 0.70 | 4.72 | 0.27 | 1.88 | 0.20 | 0.00 | 0.00 |
| -1200 | 93.39 | 0.70 | 4.71 | 0.27 | 1.90 | 0.21 | 0.00 | 0.00 |
| -1215 | 93.48 | 0.70 | 4.61 | 0.27 | 1.91 | 0.21 | 0.00 | 0.00 |
| -1230 | 93.54 | 0.70 | 4.59 | 0.27 | 1.88 | 0.20 | 0.00 | 0.00 |
| -1245 | 93.77 | 0.69 | 4.38 | 0.26 | 1.85 | 0.20 | 0.00 | 0.00 |
| -1260 | 93.99 | 0.69 | 4.19 | 0.26 | 1.82 | 0.20 | 0.00 | 0.00 |
| -1275 | 93.96 | 0.70 | 4.19 | 0.26 | 1.86 | 0.20 | 0.00 | 0.00 |
| -1290 | 93.85 | 0.70 | 4.25 | 0.26 | 1.90 | 0.20 | 0.00 | 0.00 |
| -1305 | 93.76 | 0.72 | 4.28 | 0.27 | 1.95 | 0.21 | 0.00 | 0.00 |
| -1320 | 93.56 | 0.74 | 4.45 | 0.28 | 1.99 | 0.22 | 0.00 | 0.00 |
| -1335 | 93.28 | 0.77 | 4.63 | 0.29 | 2.09 | 0.22 | 0.00 | 0.00 |
| -1350 | 93.22 | 0.78 | 4.66 | 0.29 | 2.12 | 0.23 | 0.00 | 0.00 |
| -1365 | 93.43 | 0.77 | 4.51 | 0.29 | 2.06 | 0.23 | 0.00 | 0.00 |



**Table ST4. DAP→ AmOx treated Noto limestone. Weight fraction (Wt) and estimated standard deviation (Esd) of calcite, whewellite, hydroxyapatite, and weddellite as a function of the penetration depth from the treated surface.**

| Penetration depth (µm) | Calcite |         | Whewellite |         | Hydroxyapatite |         | Weddellite |         |
|------------------------|---------|---------|------------|---------|----------------|---------|------------|---------|
|                        | Wt (%)  | Esd (%) | Wt (%)     | Esd (%) | Wt (%)         | Esd (%) | Wt (%)     | Esd (%) |
| 0                      | 55.07   | 0.00    | 35.63      | 0.00    | 7.52           | 0.00    | 1.77       | 0.00    |
| -15                    | 67.49   | 0.00    | 28.17      | 0.00    | 3.61           | 0.00    | 0.73       | 0.00    |
| -30                    | 73.45   | 0.00    | 23.59      | 0.00    | 2.47           | 0.00    | 0.49       | 0.00    |
| -45                    | 73.14   | 0.00    | 23.76      | 0.00    | 2.72           | 0.00    | 0.37       | 0.00    |
| -60                    | 72.96   | 0.00    | 24.45      | 0.00    | 2.28           | 0.00    | 0.31       | 0.00    |
| -75                    | 72.97   | 0.00    | 24.62      | 0.00    | 2.16           | 0.00    | 0.24       | 0.00    |
| -90                    | 73.21   | 0.71    | 22.88      | 0.56    | 3.37           | 0.37    | 0.54       | 0.00    |
| -105                   | 73.51   | 0.69    | 21.97      | 0.52    | 4.36           | 0.36    | 0.16       | 0.00    |
| -120                   | 72.17   | 0.68    | 22.26      | 0.52    | 5.46           | 0.36    | 0.11       | 0.00    |
| -135                   | 71.77   | 0.68    | 21.70      | 0.51    | 6.48           | 0.37    | 0.06       | 0.00    |
| -150                   | 71.38   | 0.69    | 21.35      | 0.52    | 7.07           | 0.39    | 0.19       | 0.11    |
| -165                   | 72.38   | 0.69    | 19.91      | 0.51    | 7.53           | 0.39    | 0.18       | 0.11    |
| -180                   | 74.16   | 0.69    | 17.95      | 0.48    | 7.89           | 0.39    | 0.00       | 0.00    |
| -195                   | 76.25   | 0.68    | 15.99      | 0.45    | 7.76           | 0.38    | 0.00       | 0.00    |
| -210                   | 77.57   | 0.68    | 14.57      | 0.44    | 7.85           | 0.37    | 0.00       | 0.00    |
| -225                   | 78.33   | 0.68    | 13.49      | 0.42    | 8.18           | 0.37    | 0.00       | 0.00    |
| -240                   | 78.59   | 0.69    | 12.67      | 0.42    | 8.74           | 0.38    | 0.00       | 0.00    |
| -255                   | 79.59   | 0.69    | 11.55      | 0.40    | 8.86           | 0.38    | 0.00       | 0.00    |
| -270                   | 80.32   | 0.70    | 10.74      | 0.40    | 8.94           | 0.38    | 0.00       | 0.00    |
| -285                   | 80.72   | 0.70    | 10.28      | 0.39    | 8.99           | 0.38    | 0.00       | 0.00    |
| -300                   | 82.16   | 0.71    | 8.95       | 0.37    | 8.89           | 0.38    | 0.00       | 0.00    |
| -315                   | 84.05   | 0.70    | 7.48       | 0.34    | 8.47           | 0.37    | 0.00       | 0.00    |
| -330                   | 85.30   | 0.69    | 6.58       | 0.32    | 8.11           | 0.36    | 0.00       | 0.00    |
| -345                   | 86.03   | 0.69    | 6.03       | 0.31    | 7.95           | 0.35    | 0.00       | 0.00    |
| -360                   | 86.17   | 0.70    | 5.94       | 0.31    | 7.89           | 0.35    | 0.00       | 0.00    |
| -375                   | 86.62   | 0.70    | 5.64       | 0.31    | 7.74           | 0.35    | 0.00       | 0.00    |
| -390                   | 87.35   | 0.70    | 5.25       | 0.30    | 7.40           | 0.34    | 0.00       | 0.00    |
| -405                   | 88.20   | 0.71    | 4.80       | 0.29    | 7.00           | 0.34    | 0.00       | 0.00    |
| -420                   | 88.69   | 0.70    | 4.65       | 0.29    | 6.66           | 0.33    | 0.00       | 0.00    |



|      |       |      |      |      |      |      |      |      |
|------|-------|------|------|------|------|------|------|------|
| -435 | 89.11 | 0.71 | 4.47 | 0.29 | 6.43 | 0.33 | 0.00 | 0.00 |
| -450 | 89.67 | 0.71 | 4.09 | 0.28 | 6.24 | 0.33 | 0.00 | 0.00 |
| -465 | 90.51 | 0.70 | 3.60 | 0.26 | 5.89 | 0.32 | 0.00 | 0.00 |
| -480 | 90.54 | 0.70 | 3.56 | 0.26 | 5.90 | 0.32 | 0.00 | 0.00 |
| -495 | 90.65 | 0.70 | 3.46 | 0.26 | 5.89 | 0.32 | 0.00 | 0.00 |
| -510 | 90.53 | 0.70 | 3.37 | 0.25 | 6.10 | 0.32 | 0.00 | 0.00 |
| -525 | 90.49 | 0.69 | 3.34 | 0.25 | 6.17 | 0.31 | 0.00 | 0.00 |
| -540 | 91.11 | 0.69 | 3.07 | 0.24 | 5.81 | 0.30 | 0.00 | 0.00 |
| -555 | 91.42 | 0.70 | 2.95 | 0.24 | 5.63 | 0.31 | 0.00 | 0.00 |
| -570 | 91.30 | 0.70 | 2.95 | 0.24 | 5.75 | 0.31 | 0.00 | 0.00 |
| -585 | 93.76 | 0.70 | 2.33 | 0.24 | 3.91 | 0.31 | 0.00 | 0.00 |
| -600 | 92.94 | 0.70 | 2.58 | 0.25 | 4.47 | 0.32 | 0.00 | 0.00 |
| -615 | 92.44 | 0.68 | 2.81 | 0.25 | 4.75 | 0.31 | 0.00 | 0.00 |
| -630 | 92.25 | 0.68 | 2.84 | 0.24 | 4.91 | 0.30 | 0.00 | 0.00 |
| -645 | 92.25 | 0.67 | 2.75 | 0.24 | 4.99 | 0.30 | 0.00 | 0.00 |
| -660 | 92.00 | 0.68 | 2.83 | 0.24 | 5.18 | 0.31 | 0.00 | 0.00 |
| -675 | 92.10 | 0.69 | 2.71 | 0.24 | 5.19 | 0.31 | 0.00 | 0.00 |
| -690 | 94.42 | 0.71 | 1.86 | 0.24 | 3.72 | 0.32 | 0.00 | 0.00 |
| -705 | 94.59 | 0.71 | 1.79 | 0.24 | 3.61 | 0.32 | 0.00 | 0.00 |
| -720 | 94.98 | 0.72 | 1.62 | 0.23 | 3.40 | 0.32 | 0.00 | 0.00 |
| -735 | 95.07 | 0.72 | 1.61 | 0.23 | 3.32 | 0.31 | 0.00 | 0.00 |
| -750 | 95.61 | 0.72 | 1.48 | 0.23 | 2.92 | 0.31 | 0.00 | 0.00 |
| -765 | 96.04 | 0.73 | 1.42 | 0.23 | 2.54 | 0.30 | 0.00 | 0.00 |
| -780 | 96.30 | 0.72 | 1.37 | 0.23 | 2.33 | 0.30 | 0.00 | 0.00 |
| -795 | 96.28 | 0.73 | 1.48 | 0.23 | 2.24 | 0.30 | 0.00 | 0.00 |
| -810 | 96.42 | 0.73 | 1.46 | 0.23 | 2.12 | 0.29 | 0.00 | 0.00 |
| -825 | 96.34 | 0.72 | 1.46 | 0.22 | 2.21 | 0.29 | 0.00 | 0.00 |
| -840 | 96.40 | 0.72 | 1.43 | 0.22 | 2.17 | 0.29 | 0.00 | 0.00 |
| -855 | 96.26 | 0.71 | 1.53 | 0.22 | 2.21 | 0.29 | 0.00 | 0.00 |
| -870 | 95.97 | 0.73 | 1.66 | 0.23 | 2.38 | 0.29 | 0.00 | 0.00 |
| -885 | 96.05 | 0.74 | 1.56 | 0.23 | 2.39 | 0.30 | 0.00 | 0.00 |
| -900 | 96.35 | 0.78 | 1.40 | 0.24 | 2.25 | 0.31 | 0.00 | 0.00 |

|       |       |      |      |      |      |      |      |      |
|-------|-------|------|------|------|------|------|------|------|
| -915  | 96.62 | 0.76 | 1.25 | 0.23 | 2.13 | 0.30 | 0.00 | 0.00 |
| -930  | 96.48 | 0.74 | 1.32 | 0.23 | 2.20 | 0.30 | 0.00 | 0.00 |
| -945  | 96.46 | 0.74 | 1.27 | 0.22 | 2.27 | 0.30 | 0.00 | 0.00 |
| -960  | 96.54 | 0.72 | 1.23 | 0.21 | 2.22 | 0.29 | 0.00 | 0.00 |
| -975  | 96.31 | 0.70 | 1.25 | 0.21 | 2.44 | 0.28 | 0.00 | 0.00 |
| -990  | 96.10 | 0.70 | 1.33 | 0.21 | 2.57 | 0.28 | 0.00 | 0.00 |
| -1005 | 95.95 | 0.70 | 1.42 | 0.21 | 2.63 | 0.28 | 0.00 | 0.00 |
| -1020 | 95.93 | 0.70 | 1.48 | 0.21 | 2.59 | 0.28 | 0.00 | 0.00 |
| -1035 | 95.80 | 0.70 | 1.58 | 0.22 | 2.61 | 0.28 | 0.00 | 0.00 |
| -1050 | 95.57 | 0.70 | 1.63 | 0.22 | 2.80 | 0.28 | 0.00 | 0.00 |
| -1065 | 95.64 | 0.70 | 1.53 | 0.21 | 2.82 | 0.28 | 0.00 | 0.00 |
| -1080 | 95.82 | 0.69 | 1.43 | 0.20 | 2.75 | 0.27 | 0.00 | 0.00 |
| -1095 | 96.03 | 0.70 | 1.30 | 0.20 | 2.67 | 0.28 | 0.00 | 0.00 |
| -1110 | 95.78 | 0.71 | 1.33 | 0.21 | 2.89 | 0.28 | 0.00 | 0.00 |
| -1125 | 95.64 | 0.72 | 1.36 | 0.20 | 3.00 | 0.28 | 0.00 | 0.00 |
| -1140 | 95.66 | 0.73 | 1.36 | 0.21 | 2.99 | 0.29 | 0.00 | 0.00 |
| -1155 | 95.44 | 0.72 | 1.50 | 0.21 | 3.06 | 0.29 | 0.00 | 0.00 |
| -1170 | 95.22 | 0.72 | 1.56 | 0.21 | 3.22 | 0.29 | 0.00 | 0.00 |
| -1185 | 95.49 | 0.72 | 1.45 | 0.21 | 3.07 | 0.28 | 0.00 | 0.00 |
| -1200 | 95.67 | 0.71 | 1.39 | 0.20 | 2.94 | 0.28 | 0.00 | 0.00 |
| -1215 | 95.92 | 0.71 | 1.20 | 0.19 | 2.87 | 0.27 | 0.00 | 0.00 |
| -1230 | 96.20 | 0.71 | 1.06 | 0.18 | 2.74 | 0.27 | 0.00 | 0.00 |
| -1245 | 96.25 | 0.72 | 1.08 | 0.19 | 2.67 | 0.27 | 0.00 | 0.00 |
| -1260 | 96.36 | 0.72 | 1.03 | 0.19 | 2.61 | 0.27 | 0.00 | 0.00 |
| -1275 | 96.53 | 0.71 | 0.91 | 0.18 | 2.56 | 0.27 | 0.00 | 0.00 |
| -1290 | 96.46 | 0.70 | 0.89 | 0.18 | 2.65 | 0.27 | 0.00 | 0.00 |
| -1305 | 96.19 | 0.70 | 0.96 | 0.18 | 2.85 | 0.27 | 0.00 | 0.00 |
| -1320 | 96.08 | 0.70 | 1.03 | 0.18 | 2.89 | 0.27 | 0.00 | 0.00 |
| -1335 | 96.10 | 0.70 | 1.06 | 0.18 | 2.84 | 0.27 | 0.00 | 0.00 |
| -1350 | 96.05 | 0.70 | 1.12 | 0.18 | 2.84 | 0.26 | 0.00 | 0.00 |
| -1365 | 96.02 | 0.71 | 1.15 | 0.19 | 2.82 | 0.27 | 0.00 | 0.00 |
| -1380 | 96.33 | 0.71 | 1.08 | 0.19 | 2.59 | 0.27 | 0.00 | 0.00 |

|       |       |      |      |      |      |      |      |      |
|-------|-------|------|------|------|------|------|------|------|
| -1395 | 96.59 | 0.70 | 0.99 | 0.18 | 2.42 | 0.26 | 0.00 | 0.00 |
| -1410 | 96.66 | 0.71 | 0.97 | 0.18 | 2.37 | 0.26 | 0.00 | 0.00 |
| -1425 | 96.44 | 0.72 | 1.08 | 0.19 | 2.47 | 0.27 | 0.00 | 0.00 |
| -1440 | 96.07 | 0.74 | 1.25 | 0.20 | 2.68 | 0.28 | 0.00 | 0.00 |
| -1455 | 95.92 | 0.74 | 1.31 | 0.20 | 2.77 | 0.28 | 0.00 | 0.00 |
| -1470 | 95.86 | 0.73 | 1.34 | 0.20 | 2.80 | 0.28 | 0.00 | 0.00 |
